# Supplementary material for: Radiomics for the Prediction of Response to Antifibrotic Treatment in Patients with Idiopathic Pulmonary Fibrosis: A Pilot Study
Source: MDPI journal article supplement (doi:10.3390/diagnostics12041002), 2022-04-15
Supplement: s1 [file s1]

**Table S1.** Acquisition Protocols and Technical Parameters for HRCT Scans in the Two Institutions.

|                                    | Institution 1                                                                                                                        | Institution 2                                                                                                                                                                                                                                            |
|------------------------------------|--------------------------------------------------------------------------------------------------------------------------------------|----------------------------------------------------------------------------------------------------------------------------------------------------------------------------------------------------------------------------------------------------------|
| Multi-detector CT scanners         | 256-slice Somatom Definition Flash (Siemens Healthcare, Forchheim, Germany),<br>128-slice Somatom Definition AS (Siemens Healthcare) | 256-slice Somatom Definition Flash (Siemens Healthcare, Forchheim, Germany),<br>128-slice Somatom Definition AS (Siemens Healthcare),<br>16-slice Somatom Emotion (Siemens Healthcare),<br>256-slice Brilliance iCT (Philips Healthcare, Cleveland, USA) |
| Tube voltage (kVp)                 | 120                                                                                                                                  | 120                                                                                                                                                                                                                                                      |
| Gantry rotation speed (s/r)        | 0.5                                                                                                                                  | 0.5 or 0.6                                                                                                                                                                                                                                               |
| Collimation (mm)                   | 128 × 0.6 or 256 × 0.6                                                                                                               | 16 × 0.6 or 128 × 0.6 or 256 × 0.6                                                                                                                                                                                                                       |
| Reconstructed slice thickness (mm) | 1.5                                                                                                                                  | 1.5                                                                                                                                                                                                                                                      |
| Reconstruction kernel              | sharp                                                                                                                                | sharp                                                                                                                                                                                                                                                    |
